# Supplementary material
Source: Springer Nature journal article supplement (https://www.springermedizin.de/resource/supplementary/12880_2010_249_MOESM3_ESM.pdf/9450006)

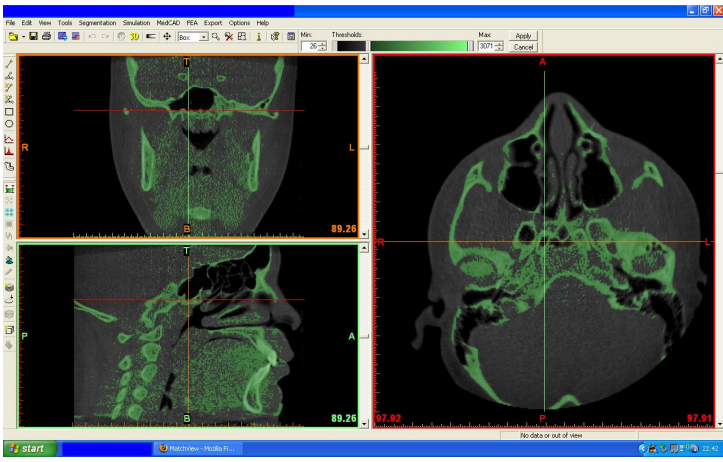

A

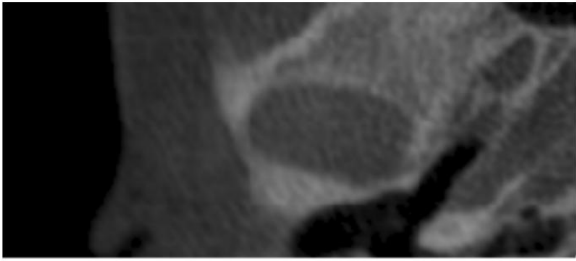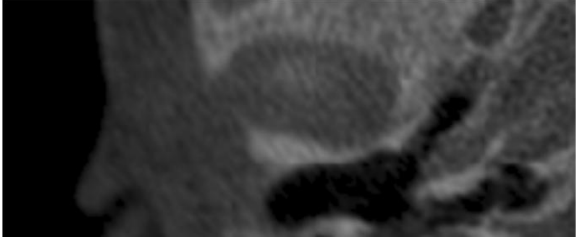

B

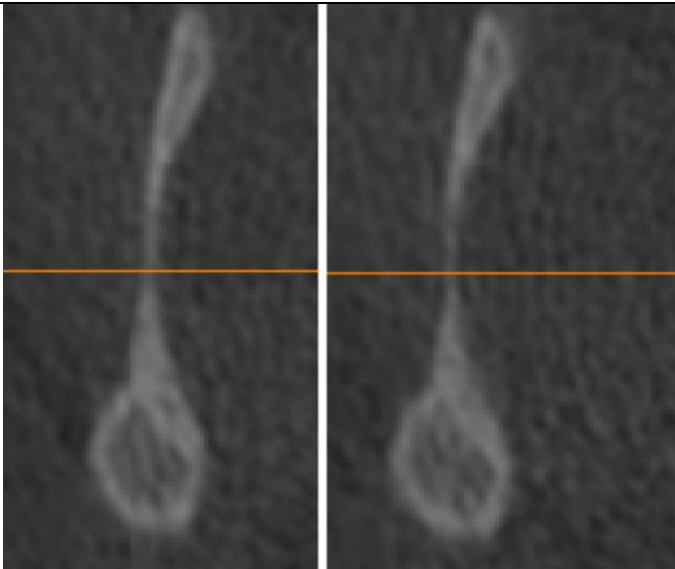

C

Supplement: MOESM3 [file 9450006]
